# Supplementary material for: Sparsity as Cellular Objective to Infer Directed Metabolic Networks from Steady-State Metabolome Data: A Theoretical Analysis
Source: PLoS One. 2013 Dec 31;8(12):e84505. doi: 10.1371/journal.pone.0084505 (PMC3877278; doi:10.1371/journal.pone.0084505)
Supplement: Information S1 — Derivation of Modified Lyapunov Equation ( Eqn. 6 ) from Eqn. 5 , and the algorithm of the developed method. (PDF) [file pone.0084505.s001.pdf]

## SUPPORTING INFORMATION S1

### 1. Derivation of Modified Lyapunov Equation: Equation (6)

$$\text{vec}(\mathbf{J}\mathbf{\Gamma} + \mathbf{\Gamma}\mathbf{J}^T = -2\mathbf{D})$$

$$\text{vec}(\mathbf{J}\mathbf{\Gamma} + \mathbf{\Gamma}\mathbf{J}^T) = \text{vec}(-2\mathbf{D})$$

$$\text{vec}(\mathbf{J}\mathbf{\Gamma}) + \text{vec}(\mathbf{\Gamma}\mathbf{J}^T) = -2\mathbf{d}$$

with  $\mathbf{d}$  being vectorized form of  $\mathbf{D}$ .

Rule 1:  $\text{vec}(\mathbf{ABC}) = (\mathbf{C}^T \otimes \mathbf{A}) \text{vec}(\mathbf{B})$

Rule 2: Multiplication with identity matrix will not affect the equality.

Applying those rules;

$$\text{vec}(\mathbf{I}\mathbf{J}\mathbf{\Gamma}) = (\mathbf{\Gamma}^T \otimes \mathbf{I}) \text{vec}(\mathbf{J})$$

$$\text{vec}(\mathbf{\Gamma}\mathbf{J}^T\mathbf{I}) = (\mathbf{I} \otimes \mathbf{\Gamma}) \text{vec}(\mathbf{J}^T)$$

$$(\mathbf{\Gamma}^T \otimes \mathbf{I}) \text{vec}(\mathbf{J}) + (\mathbf{I} \otimes \mathbf{\Gamma}) \text{vec}(\mathbf{J}^T) = -2\mathbf{d}$$

Rule 3:  $\text{vec}(\mathbf{J}) = \mathbf{P} \text{vec}(\mathbf{J}^T)$  with  $\mathbf{P}$  being a permutation matrix

$$(\mathbf{\Gamma}^T \otimes \mathbf{I}) \text{vec}(\mathbf{J}) + (\mathbf{I} \otimes \mathbf{\Gamma}) \mathbf{P} \text{vec}(\mathbf{J}) = -2\mathbf{d}$$

Hence,

$$\mathbf{A} = (\mathbf{\Gamma}^T \otimes \mathbf{I}) + (\mathbf{I} \otimes \mathbf{\Gamma}) \mathbf{P} = (\mathbf{\Gamma} \otimes \mathbf{I}) + (\mathbf{I} \otimes \mathbf{\Gamma}) \mathbf{P} \quad (\text{since } \mathbf{\Gamma} \text{ is symmetric, its transpose is the same})$$

For a 2 x 2 system, given that covariance matrix,  $\mathbf{\Gamma}$ , is of the form  $\begin{bmatrix} a & b \\ b & d \end{bmatrix}$ , eqn.(5) with

Jacobian matrix in vectorized form looks as follows;

$$\begin{bmatrix} a & b & 0 & 0 \\ b & d & 0 & 0 \\ 0 & 0 & a & b \\ 0 & 0 & b & d \end{bmatrix} \begin{bmatrix} j_{11} \\ j_{12} \\ j_{21} \\ j_{22} \end{bmatrix} + \begin{bmatrix} a & b & 0 & 0 \\ 0 & 0 & a & b \\ b & d & 0 & 0 \\ 0 & 0 & b & d \end{bmatrix} \begin{bmatrix} j_{11} \\ j_{12} \\ j_{21} \\ j_{22} \end{bmatrix} = -2 \begin{pmatrix} 1 \\ 0 \\ 1 \\ 0 \end{pmatrix}$$

The addition of two coefficient matrices appearing in the equation above gives **A** matrix of eqn. (6).

## 2. The Algorithm of the Developed Method to Infer the Network based on Lyapunov Equation

**Input:** covariance matrix, fluctuation matrix

**Output:** Jacobian vector (j)

### Algorithm:

1. Fix the length of the individuals of Genetic Algorithm (GA), to be represented as bit-string.
2. Convert the input covariance matrix to GGM (Graphical Gaussian Model) correlation matrix
3. Check GGM-type correlations with  $>0.60$  and  $< 0.001$   
 IF  $>0.60$   
     Make the corresponding symmetric entries in binary individuals 1  
 ELSEIF  $< 0.001$   
     Make the corresponding symmetric entries in binary individuals 0.
4. Determine the number of entries of the individuals that was not assigned a value. This will be the input parameter to GA as the length of individuals.
5. Enter parameters for GA:  
 Population Size (150), Number of Generations (800), Mutation Rate (1/IndividualLength), Elite Count (3), Individual Length, Other Parameters: default
6. Do GA to assign binary values to the rest of entries in the original individual vectors
7. For each generated individual,
  - a. Apply least square solution to  $Aj=d$  by fixing the entries of  $j$  which corresponds to zeros of the individual vector to zero.
  - b. Calculate the values of each of the two terms of the fitness equation (Eqn.7) for the individual.

- c. Replace the first term by  $(n^2-n) \times 0.9$  if it is greater than this value.
  - d. Replace the second term by  $(10 - [10 + \log_{10}(\|A_j + 2d\|)]/50)$  if the residual norm of the individual is smaller than  $1 \times 10^{-10}$ .
  - e. Calculate the fitness of the individual.
8. Repeat 6. and 7. for the entered Number of Generations.
  9. Select best individual in the last population, and record the corresponding  $j$ .
  10. Compare it with the true Jacobian vector, calculate TPR, FPR.
